# Supplementary material
Source: publisher site journal article supplement (https://www.dovepress.com/get_supplementary_file.php?f=416365.xlsx)
Supplement: Supplementary file 1 [file get_supplementary_file.php]

## Sheet: Supplementary Table 1
Supplementary Table 1: Hangzhou Weather
date	daily number of outpatients	city	PM2.5	PM10	NO2	SO2	CO	O3_8h	temperature	relative humidity
2020-01-01	7	Hangzhou	41	82	0.8	54	7	43	4.75	70.583
2020-01-13	20	Hangzhou	95	137	1.1	53	8	55	5.875	69.208
2020-04-26	16	Hangzhou	45	96	0.7	51	9	160	21.125	49.917
2020-04-01	12	Hangzhou	24	40	0.6	34	5	108	12.125	76.292
2020-03-19	8	Hangzhou	33	88	0.6	7	44	119	17.625	51.292
2020-01-12	13	Hangzhou	52	73	1	31	7	65	6.5	66.55
2020-03-29	13	Hangzhou	17	34	0.6	5	48	32	6.458	87.875
2020-04-20	26	Hangzhou	28	49	0.8	41	6	144	15.917	73.333
2020-03-21	13	Hangzhou	36	68	0.8	6	39	100	19.75	68.042
2020-03-09	6	Hangzhou	10	16	0.6	4	26	52	12.833	87.75
2020-04-23	11	Hangzhou	38	77	0.6	45	7	129	16.182	53.591
2020-01-24	3	Hangzhou	33	45	0.7	15	5	83	7.375	94.833
2020-03-10	10	Hangzhou	19	31	0.7	4	25	83	10.783	75.435
2020-04-21	12	Hangzhou	19	32	0.6	37	6	114	12.75	81.542
2020-02-04	1	Hangzhou	34	49	0.6	14	6	86	7.917	79.375
2020-04-28	10	Hangzhou	17	43	0.5	42	6	130	16.667	54.25
2020-01-02	7	Hangzhou	58	98	0.8	64	7	10	8.333	84.75
2020-01-11	14	Hangzhou	16	23	0.7	36	5	34	6.083	94.083
2020-01-18	13	Hangzhou	35	48	0.9	25	5	58	4.458	69.75
2020-01-14	14	Hangzhou	115	168	1.4	55	10	61	6.292	68.667
2020-04-22	13	Hangzhou	24	49	0.6	41	6	112	14.792	67.292
2020-04-15	16	Hangzhou	26	54	0.6	47	8	131	18.958	43.583
2020-04-17	26	Hangzhou	58	116	0.9	56	10	113	21.333	57
2020-03-30	16	Hangzhou	14	21	0.7	4	40	33	8.375	92.833
2020-03-11	12	Hangzhou	43	75	0.9	6	39	107	11.375	66.375
2020-04-27	20	Hangzhou	35	73	0.6	34	6	94	16.667	72.125
2020-01-17	8	Hangzhou	19	27	0.8	26	5	40	4.278	85.611
2020-03-23	19	Hangzhou	11	31	0.5	6	32	83	14.333	50.667
2020-02-01	3	Hangzhou	34	43	0.7	17	6	98	6.333	52.208
2020-03-22	23	Hangzhou	29	48	0.7	5	33	90	17.917	85
2020-02-22	5	Hangzhou	33	68	0.5	21	6	115	12.375	58.167
2020-04-13	26	Hangzhou	44	88	0.6	42	7	152	14.783	35.652
2020-04-19	20	Hangzhou	27	57	0.8	35	5	98	14.273	83.5
2020-01-09	4	Hangzhou	49	77	1	58	8	14	5	78
2020-03-28	17	Hangzhou	8	19	0.6	4	26	71	5.565	86.87
2020-01-07	8	Hangzhou	32	67	1.4	48	7	12	12.083	84.667
2020-01-08	8	Hangzhou	35	57	1	28	5	59	6.25	63.208
2020-01-15	6	Hangzhou	69	98	1.1	64	7	17	4.917	84.375
2020-04-24	18	Hangzhou	33	75	0.6	57	7	153	17.292	43.75
2020-04-05	19	Hangzhou	20	58	0.5	33	6	85	12.583	55.833
2020-04-16	32	Hangzhou	38	79	0.7	62	8	133	20.875	48.708
2020-01-20	24	Hangzhou	60	86	1	38	6	94	6.292	73.25
2020-04-14	32	Hangzhou	54	102	0.8	62	8	138	14.75	48.167
2020-01-16	10	Hangzhou	9	14	0.6	32	5	46	5.458	95.875
2020-04-07	24	Hangzhou	34	76	0.6	57	6	121	13.042	55.75
2020-02-28	3	Hangzhou	32	59	0.7	29	5	43	10.667	82.083
2020-04-09	19	Hangzhou	50	110	0.7	67	9	141	16.833	51.5
2020-02-19	6	Hangzhou	32	46	0.6	27	6	73	6.417	58.708
2020-03-14	20	Hangzhou	16	40	0.6	5	30	83	10.625	68.083
2020-03-07	10	Hangzhou	34	48	0.8	5	44	62	12.792	81.542
2020-01-06	8	Hangzhou	29	59	1.1	48	7	39	14.833	82.542
2020-02-21	4	Hangzhou	23	34	0.5	22	5	86	10.875	73.25
2020-01-03	3	Hangzhou	48	80	1.2	57	7	4	8.292	93.25
2020-02-23	6	Hangzhou	59	121	0.6	25	6	119	11.167	62.542
2020-01-22	11	Hangzhou	61	85	1.3	32	5	28	7.625	92.625
2020-01-21	19	Hangzhou	94	137	1.2	51	6	58	6.583	75.458
2020-04-04	19	Hangzhou	56	112	0.8	56	7	146	13.458	65.875
2020-02-17	1	Hangzhou	17	31	0.5	9	6	98	5.13	38.783
2020-04-12	13	Hangzhou	22	48	0.6	22	6	125	13	52.875
2020-03-24	18	Hangzhou	26	55	0.6	8	55	53	14.792	62.083
2020-03-20	19	Hangzhou	30	84	0.6	7	48	128	16.917	43.167
2020-04-08	26	Hangzhou	30	72	0.6	54	7	129	15.125	39.708
2020-03-12	8	Hangzhou	40	69	0.8	6	44	70	12.208	74.458
2020-04-03	8	Hangzhou	31	72	0.6	49	5	70	12.458	71.625
2020-04-06	21	Hangzhou	25	63	0.5	41	7	80	11.167	64.958
2020-01-10	7	Hangzhou	18	25	0.8	51	5	7	6.208	97.042
2020-04-18	33	Hangzhou	43	101	0.8	50	8	101	16.708	69.167
2020-03-15	13	Hangzhou	23	62	0.5	6	43	108	13.417	48.5
2020-04-30	15	Hangzhou	42	86	0.8	60	7	151	24.625	54.208
2020-04-02	11	Hangzhou	28	61	0.6	41	6	86	12.542	66.583
2020-03-13	7	Hangzhou	44	70	0.8	6	39	59	12.333	84.333
2020-03-31	10	Hangzhou	18	29	0.7	4	45	56	9.913	95.783
2020-01-05	14	Hangzhou	41	70	1	54	6	32	11.208	89.708
2020-03-26	17	Hangzhou	36	64	0.8	5	59	44	20.875	81.75
2020-01-23	2	Hangzhou	18	24	1.1	25	5	44	7.792	96.125
2020-03-01	6	Hangzhou	20	28	0.8	5	25	53	9.875	87.042
2020-03-27	9	Hangzhou	12	28	0.6	4	29	52	12.292	84.208
2020-03-17	9	Hangzhou	28	68	0.6	6	46	125	16.958	53.958
2020-02-27	2	Hangzhou	30	60	0.7	20	5	86	9.5	75.208
2020-04-29	10	Hangzhou	36	78	0.7	59	8	172	20.667	55.292
2020-02-20	3	Hangzhou	31	45	0.5	26	6	110	10.5	62.083
2020-04-25	18	Hangzhou	28	68	0.7	48	8	148	19.125	46
2020-03-05	6	Hangzhou	26	46	0.6	6	30	112	8.333	53.625
2020-04-11	22	Hangzhou	19	36	0.6	30	4	73	12.333	89.208
2020-01-19	11	Hangzhou	45	62	0.9	34	6	67	5.625	72.292
2020-03-08	3	Hangzhou	30	50	0.7	5	36	72	12.417	81
2020-04-10	19	Hangzhou	49	101	0.7	49	8	150	16.792	68.125
2020-03-18	14	Hangzhou	41	79	0.7	6	46	134	18.292	56.25
2020-03-16	17	Hangzhou	26	65	0.5	6	40	112	13.625	53.25
2020-03-04	5	Hangzhou	38	61	0.8	6	47	61	8.875	80.375
2020-01-28	4	Hangzhou	31	36	1	10	4	65	4.958	73.792
2020-02-16	2	Hangzhou	15	28	0.5	8	5	83	2.833	55.833
2020-02-26	6	Hangzhou	28	42	0.6	22	4	58	10.958	84.958
2020-03-25	14	Hangzhou	31	68	0.8	7	67	75	19	63.708
2020-02-29	6	Hangzhou	18	27	0.9	31	5	29	9.833	90.75
2020-01-04	4	Hangzhou	25	36	0.9	51	5	7	8.792	96.75
2020-02-03	1	Hangzhou	47	62	0.7	15	6	115	8.667	72.667
2020-03-06	5	Hangzhou	37	59	0.7	6	47	68	8.5	73.833
2020-02-24	4	Hangzhou	39	72	0.6	32	6	113	17.167	60.167
2020-02-02	2	Hangzhou	29	40	0.6	19	6	81	7.958	63.083
2020-01-26	1	Hangzhou	6	8	0.6	10	5	68	6.042	95.958
2020-03-03	3	Hangzhou	32	52	0.7	5	38	65	8.125	86.375
2020-03-02	2	Hangzhou	24	38	0.8	5	20	88	8.917	72.708
2020-02-12	1	Hangzhou	26	33	0.7	16	5	39	11.708	91.917
2020-01-29	1	Hangzhou	46	55	0.7	10	5	95	6.5	53.417
2020-02-10	1	Hangzhou	26	34	0.7	14	5	79	8.917	71.167
2020-12-30	14	Hangzhou	19	106	32	1.9	81	37	-1.731	55.038
2020-12-23	19	Hangzhou	59	89	119	0.6	97	80	8.269	71.115
2020-12-16	31	Hangzhou	45	105	68	0.3	62	1	4.192	39.385
2020-12-13	24	Hangzhou	57	55	114	0.5	49	29	8.346	70.308
2020-12-09	18	Hangzhou	69	74	61	0.3	79	104	10.346	75.654
2020-12-02	19	Hangzhou	55	99	93	1.1	80	49	10.462	80.077
2020-12-26	27	Hangzhou	16	76	54	2	9	86	9.077	70.308
2020-12-29	16	Hangzhou	29	91	29	1.4	4	109	7.077	87.385
2020-12-20	35	Hangzhou	18	67	116	1.5	42	9	4.923	58.231
2020-12-08	12	Hangzhou	75	22	73	1.5	58	2	8.5	85.769
2020-12-06	25	Hangzhou	112	102	41	1.5	84	0	9.731	71.385
2020-12-10	14	Hangzhou	101	72	78	1.2	59	64	10.577	78.615
2020-12-01	16	Hangzhou	100	114	65	1.3	19	48	10.538	71.154
2020-12-12	25	Hangzhou	12	31	89	0.1	80	64	8.769	74.577
2020-12-28	24	Hangzhou	107	78	64	1.4	13	87	9.962	80.308
2020-12-31	12	Hangzhou	61	31	28	1.3	64	50	-2.56	43.24
2020-12-27	17	Hangzhou	71	29	22	1.6	24	103	10.269	73.577
2020-12-24	15	Hangzhou	68	114	53	1.9	41	25	9.269	62.769
2020-12-22	23	Hangzhou	117	43	58	1.1	115	47	5.692	65.462
2020-12-19	18	Hangzhou	117	26	68	0.6	29	95	5.346	66.115
2020-12-17	18	Hangzhou	5	50	25	1.5	93	70	5.885	53.192
2020-12-15	9	Hangzhou	110	38	64	0.9	44	3	3.115	45.577
2020-12-03	18	Hangzhou	83	58	47	0.6	44	5	7.615	78.308
2020-12-18	24	Hangzhou	99	109	70	1.3	67	7	4.538	87.385
2020-12-11	11	Hangzhou	12	82	67	1.7	18	85	9.192	88.423
2020-12-07	23	Hangzhou	100	94	51	0.5	63	42	9.615	84.731
2020-12-25	16	Hangzhou	104	84	18	1.1	87	12	7.538	62.115
2020-12-21	28	Hangzhou	46	32	108	0.3	35	59	4.077	60.923
2020-12-04	13	Hangzhou	18	107	22	0.9	6	27	6.231	59.577
2020-12-05	30	Hangzhou	78	30	98	1.3	36	0	7.038	64.769
2020-12-14	17	Hangzhou	48	81	96	0.6	6	14	2.615	72.269
2021-01-01	11	Hangzhou	54	41	80	1.8	73	27	0.269	52.385
2021-01-02	14	Hangzhou	25	30	47	0.7	94	59	2.692	56.269
2021-01-03	7	Hangzhou	73	46	51	0.8	56	21	5.231	73.385
2021-01-04	14	Hangzhou	29	111	27	1.1	17	76	9.077	76.192
2021-01-05	9	Hangzhou	64	54	0	1.4	87	41	6.923	82.538
2021-01-06	13	Hangzhou	46	117	40	0	12	13	4.5	66.5
2021-01-07	11	Hangzhou	3	39	62	0.3	50	66	-1.231	40.846
2021-01-08	8	Hangzhou	119	37	70	0.2	94	83	-2.962	26.5
2021-01-09	13	Hangzhou	95	89	36	0.3	11	43	-0.154	34.577
2021-01-10	17	Hangzhou	96	42	98	0.3	114	119	1.846	38.846
2021-01-11	17	Hangzhou	19	50	92	0.7	119	31	3.269	30.346
2021-01-12	17	Hangzhou	120	55	119	1.5	104	97	4.962	33.154
2021-01-13	14	Hangzhou	4	65	96	1.5	49	52	9	35.231
2021-01-14	14	Hangzhou	44	108	114	0.4	71	40	10.154	43.885
2021-01-15	22	Hangzhou	60	3	87	1.3	102	69	12.462	42.731
2021-01-16	10	Hangzhou	75	71	106	0.3	26	42	5.808	58.423
2021-01-17	9	Hangzhou	104	39	114	1.9	79	6	3.577	49.385
2021-01-18	17	Hangzhou	84	8	32	0.2	11	78	5.385	46.577
2021-01-19	6	Hangzhou	59	7	48	1.6	90	35	6.923	53.115
2021-01-20	13	Hangzhou	66	41	40	1	23	101	10.423	71
2021-01-21	10	Hangzhou	98	48	57	0	31	81	14.192	74.846
2021-01-22	12	Hangzhou	92	81	16	0.9	22	27	11.192	92.038
2021-01-23	19	Hangzhou	105	1	55	0.3	98	61	8.385	89.5
2021-01-24	9	Hangzhou	78	60	66	0.7	24	81	7.692	80.115
2021-01-25	12	Hangzhou	2	87	22	0.5	59	40	10.36	85.84
2021-01-26	12	Hangzhou	91	31	34	1.7	24	52	8.962	83.077
2021-01-27	4	Hangzhou	24	99	1	0.8	8	20	7.577	89.154
2021-01-28	6	Hangzhou	44	22	81	0.7	16	49	8.846	63.692
2021-01-29	11	Hangzhou	81	116	40	1.8	24	4	6.038	46.654
2021-01-30	7	Hangzhou	109	9	18	0	62	99	8.769	55.385
2021-01-31	13	Hangzhou	103	34	30	0.8	89	29	13.115	55.269
2021-02-01	15	Hangzhou	42	79	6	44	1	37	10.808	78.462
2021-02-02	7	Hangzhou	68	127	5	32	1	70	8.154	78.308
2021-02-03	17	Hangzhou	59	109	5	40	1	80	9.5	72.654
2021-02-04	13	Hangzhou	71	123	6	31	0.9	105	10.04	63.72
2021-02-05	15	Hangzhou	56	101	4	30	0.8	64	9.192	87.346
2021-02-06	12	Hangzhou	34	58	5	32	0.9	73	11.885	79.731
2021-02-07	12	Hangzhou	32	51	5	31	0.8	98	13.615	63.077
2021-02-08	12	Hangzhou	33	59	4	18	0.6	79	8.692	70.923
2021-02-09	14	Hangzhou	15	32	5	16	0.4	82	7.769	66.615
2021-02-10	11	Hangzhou	29	49	5	27	0.6	44	9.231	77.731
2021-02-11	2	Hangzhou	18	27	4	16	0.5	58	9.5	93.269
2021-02-12	1	Hangzhou	27	39	4	13	0.5	85	10.577	87.385
2021-02-14	7	Hangzhou	22	38	4	17	0.6	64	13.192	87.615
2021-02-15	5	Hangzhou	41	60	4	15	0.8	81	11.385	78.962
2021-02-16	8	Hangzhou	30	50	4	17	0.6	68	9.192	71.192
2021-02-17	22	Hangzhou	34	53	5	14	0.6	87	6.962	58.654
2021-02-18	16	Hangzhou	28	48	6	19	0.6	103	6.962	50
2021-02-19	11	Hangzhou	26	42	5	21	0.6	99	11.038	48.808
2021-02-20	10	Hangzhou	20	35	5	20	0.5	107	15.962	39.923
2021-02-21	24	Hangzhou	23	38	6	27	0.6	107	17.269	42.346
2021-02-22	27	Hangzhou	41	74	6	29	0.7	123	17.538	50.192
2021-02-23	21	Hangzhou	18	49	5	18	0.4	96	10.731	62.654
2021-02-24	11	Hangzhou	18	47	5	22	0.5	92	11.64	73.4
2021-02-25	9	Hangzhou	20	40	5	32	0.6	45	12.04	85.36
2021-02-26	11	Hangzhou	9	15	4	25	0.6	70	9.154	92.923
2021-02-27	15	Hangzhou	22	46	5	35	0.6	53	9.731	90.577
2021-02-28	23	Hangzhou	22	36	4	37	0.7	40	12.038	91.808
2021-03-01	7	Hangzhou	13	24	0.8	31	4	41	11.538	91.885
2021-03-02	11	Hangzhou	24	41	0.7	27	5	84	8.2	62.96
2021-03-03	13	Hangzhou	21	52	0.6	36	5	71	8.385	70.154
2021-03-04	8	Hangzhou	23	44	0.6	38	5	66	11.038	78.692
2021-03-05	10	Hangzhou	43	84	0.9	55	6	39	10.577	87.577
2021-03-06	20	Hangzhou	18	34	0.5	32	4	55	9.615	87.231
2021-03-07	11	Hangzhou	15	24	0.8	32	4	56	6.583	92.458
2021-03-08	10	Hangzhou	23	40	0.8	40	4	66	8.625	93.167
2021-03-09	17	Hangzhou	29	55	0.6	41	5	54	10.083	83.25
2021-03-10	3	Hangzhou	29	62	0.6	40	6	99	12.167	70.583
2021-03-11	12	Hangzhou	32	57	0.8	48	5	43	11	90.792
2021-03-12	7	Hangzhou	20	36	0.7	26	4	95	13.125	69.333
2021-03-13	21	Hangzhou	41	73	0.6	39	6	117	13.348	64.565
2021-03-14	19	Hangzhou	65	115	0.7	40	6	145	14.25	72.583
2021-03-15	29	Hangzhou	41	80	0.8	45	6	93	18.783	71.435
2021-03-16	21	Hangzhou	27	43	0.9	41	4	58	14.435	93.739
2021-03-17	17	Hangzhou	14	45	0.5	39	4	61	9.583	87
2021-03-18	6	Hangzhou	26	71	0.5	48	5	53	11.875	78.875
2021-03-19	11	Hangzhou	20	42	0.6	56	4	28	12.167	92
2021-03-20	17	Hangzhou	14	24	0.7	34	4	49	11.417	85.333
2021-03-21	17	Hangzhou	42	100	0.8	34	6	75	11.5	67.042
2021-03-22	17	Hangzhou	17	61	0.5	35	7	93	11.875	35.875
2021-03-23	17	Hangzhou	34	84	0.6	49	6	115	13.125	48.542
2021-03-24	20	Hangzhou	24	50	0.5	43	5	106	15	61.909
2021-03-25	15	Hangzhou	36	84	0.5	45	6	153	16	56.435
2021-03-26	16	Hangzhou	29	68	0.5	45	6	124	18.957	57.522
2021-03-27	12	Hangzhou	24	45	0.6	35	5	78	19.208	74.917
2021-03-28	20	Hangzhou	29	60	0.8	38	5	132	19.625	72.208
2021-03-29	21	Hangzhou	43	85	0.9	49	6	134	21.042	72.125
2021-03-30	12	Hangzhou	0	0	0.7	34	5	93	16.792	78.042
2021-03-31	13	Hangzhou	0	0	0.6	40	4	52	15.958	87.458
2021-04-01	16	Hangzhou	95	42	55	1.6	63	9	17.417	91.625
2021-04-02	17	Hangzhou	93	49	103	1.3	5	90	17.958	84.25
2021-04-03	19	Hangzhou	114	48	110	0.7	84	78	16.208	80.333
2021-04-04	15	Hangzhou	29	70	101	0.3	114	33	13.958	62.542
2021-04-05	35	Hangzhou	39	10	25	0.2	18	4	13.958	34.417
2021-04-06	27	Hangzhou	100	36	23	1.9	33	69	17.083	48.042
2021-04-07	23	Hangzhou	111	42	10	0.3	31	23	14.167	57.417
2021-04-08	19	Hangzhou	92	9	25	0.6	1	88	12.542	71.583
2021-04-09	13	Hangzhou	94	88	20	0.5	80	21	14.625	49.625
2021-04-10	39	Hangzhou	12	100	1	1	62	66	14.667	63.625
2021-04-11	18	Hangzhou	33	58	111	2	11	6	15.25	93.042
2021-04-12	14	Hangzhou	63	28	17	0.5	39	7	15.833	96
2021-04-13	14	Hangzhou	96	10	80	0.7	66	55	17.292	78.458
2021-04-14	22	Hangzhou	53	81	43	0	85	54	13.333	72.708
2021-04-15	21	Hangzhou	51	101	51	0.5	110	2	14.625	69.458
2021-04-16	18	Hangzhou	12	107	65	1.1	0	59	18.5	73.042
2021-04-17	19	Hangzhou	112	52	63	0.6	110	27	19.25	62.625
2021-04-18	22	Hangzhou	17	57	15	0.3	30	99	16.375	40.333
2021-04-19	20	Hangzhou	5	12	101	0.2	54	79	17.833	53.542
2021-04-20	28	Hangzhou	87	103	36	0.4	107	22	19.167	63.667
2021-04-21	12	Hangzhou	76	24	31	1.6	26	45	22.375	53.875
2021-04-22	24	Hangzhou	55	66	109	0.6	35	34	20.625	73.667
2021-04-23	33	Hangzhou	53	60	107	0.9	13	29	20.042	83.083
2021-04-24	20	Hangzhou	85	40	102	1.6	23	1	19.458	81.917
2021-04-25	19	Hangzhou	66	81	23	1.6	52	18	19.583	81.208
2021-04-26	20	Hangzhou	18	23	46	0	115	68	20.667	69.583
2021-04-27	15	Hangzhou	35	99	98	1.4	7	62	18.375	86.458
2021-04-28	18	Hangzhou	34	20	70	1.1	38	114	19.708	74.125
2021-04-29	21	Hangzhou	11	18	31	0.5	84	44	22.458	56.667
2021-04-30	27	Hangzhou	105	42	41	0.6	24	105	26.083	38.417
2021-05-01	22	Hangzhou	28	32	33	0.1	120	107	24.292	37
2021-05-02	21	Hangzhou	36	105	51	1.1	33	100	20.25	55.667
2021-05-03	27	Hangzhou	58	94	48	0.5	67	8	23.125	54.042
2021-05-04	38	Hangzhou	3	100	88	0.2	13	63	20.958	85
2021-05-05	19	Hangzhou	115	119	10	0.8	13	54	21	57.333
2021-05-06	20	Hangzhou	101	36	23	1.6	46	25	22.042	48.833
2021-05-07	19	Hangzhou	69	75	119	1.3	68	38	25.25	61.375
2021-05-08	20	Hangzhou	110	88	117	0.7	59	2	23.867	66.333
2021-05-09	6	Hangzhou	104	53	63	0.5	97	102	29.889	47.444
2021-05-10	14	Hangzhou	79	13	107	1.5	54	41	28.708	54.292
2021-05-11	28	Hangzhou	35	44	70	1.5	46	11	23	86.667
2021-05-12	14	Hangzhou	37	36	52	1.8	0	25	23.542	85
2021-05-13	10	Hangzhou	119	65	107	1.1	86	1	22.708	86.792
2021-05-14	12	Hangzhou	99	27	88	0.1	57	7	26.375	83.833
2021-05-15	20	Hangzhou	35	1	95	1.2	10	42	28.25	76
2021-05-16	17	Hangzhou	1	6	0	0.5	105	107	23.958	83.667
2021-05-17	18	Hangzhou	74	14	83	0.1	48	112	17.958	84.417
2021-05-18	16	Hangzhou	30	73	50	1.1	105	32	19.208	85.917
2021-05-19	11	Hangzhou	85	81	17	1	84	25	19.292	90.958
2021-05-20	14	Hangzhou	2	82	16	0.5	55	13	21.25	81.458
2021-05-21	15	Hangzhou	32	30	104	1.7	119	16	22.417	72.125
2021-05-22	29	Hangzhou	113	7	50	0.3	34	110	21.667	79.458
2021-05-23	23	Hangzhou	100	42	55	1.8	20	30	19.542	89.917
2021-05-24	11	Hangzhou	17	44	118	1.2	36	56	22.917	71.375
2021-05-25	12	Hangzhou	22	72	8	1.7	91	26	26.167	59.792
2021-05-26	12	Hangzhou	33	15	62	0.6	31	81	22.913	84.435
2021-05-27	13	Hangzhou	106	52	106	1.7	96	109	23.792	81.292
2021-05-28	10	Hangzhou	75	114	29	1.9	84	75	25.208	71.333
2021-05-29	14	Hangzhou	33	48	30	1.2	75	90	25.417	67.375
2021-05-30	21	Hangzhou	46	47	62	1.1	42	35	26.5	64.125
2021-05-31	17	Hangzhou	18	56	95	2	5	36	26.375	62.208
2021-06-01	19	Hangzhou	12	29	119	0	32	15	23.565	74.304
2021-06-02	9	Hangzhou	55	79	11	1.7	26	13	24.5	86.125
2021-06-03	20	Hangzhou	12	99	50	1.8	44	3	24	88.364
2021-06-04	17	Hangzhou	18	59	92	1.3	24	50	20.75	82.417
2021-06-05	8	Hangzhou	104	78	28	1.7	13	34	24.565	61.609
2021-06-06	25	Hangzhou	90	103	112	0.3	118	24	26.458	55
2021-06-07	21	Hangzhou	26	64	61	1.4	4	99	26.13	61.435
2021-06-08	23	Hangzhou	6	55	92	0.4	77	89	27.261	69.826
2021-06-09	7	Hangzhou	28	95	47	1.6	105	72	27.792	76.625
2021-06-10	11	Hangzhou	56	3	23	1.4	19	37	25.542	89.792
2021-06-11	11	Hangzhou	61	50	31	1.9	48	35	27.625	77.542
2021-06-12	14	Hangzhou	25	96	29	1.3	104	89	27.292	80.25
2021-06-13	12	Hangzhou	120	3	106	1.3	79	31	24.25	95.042
2021-06-14	15	Hangzhou	51	25	97	0.9	117	47	27.125	89.708
2021-06-15	15	Hangzhou	47	29	13	0.3	66	107	29.75	77.375
2021-06-16	12	Hangzhou	57	64	40	1.8	86	69	27.217	87.826
2021-06-17	8	Hangzhou	77	26	95	0.7	119	48	27.261	90.348
2021-06-18	5	Hangzhou	66	85	73	1	87	63	25.917	93.208
2021-06-19	16	Hangzhou	87	53	73	1.9	111	18	21.167	94
2021-06-20	20	Hangzhou	36	29	19	1.1	80	97	21.875	94.75
2021-06-21	13	Hangzhou	32	55	86	1.6	84	105	24.833	70.083
2021-06-22	18	Hangzhou	91	64	55	0.6	20	24	26.167	67.25
2021-06-23	16	Hangzhou	58	19	11	0.4	65	33	26.833	63.875
2021-06-24	9	Hangzhou	108	9	66	1.8	24	110	27.957	59.391
2021-06-25	17	Hangzhou	97	109	83	0.4	43	68	28.348	60.565
2021-06-26	21	Hangzhou	47	19	73	1.9	85	64	27.348	78.13
2021-06-27	10	Hangzhou	96	30	56	0.5	62	14	26.417	91.083
2021-06-28	15	Hangzhou	47	70	36	1.3	115	13	26.824	85.941
2021-06-29	23	Hangzhou	41	112	41	0.3	15	64	28.889	69.667
2021-06-30	9	Hangzhou	15	40	28	0.7	53	14	26.708	84.917
2021-07-01	14	Hangzhou	41	48	110	1.1	76	106	25.667	90.958
2021-07-02	5	Hangzhou	27	73	42	0.6	117	63	25.292	96.375
2021-07-03	20	Hangzhou	31	14	22	0.2	67	18	27.792	85.333
2021-07-04	15	Hangzhou	7	95	40	0.3	22	66	28.75	81.083
2021-07-05	29	Hangzhou	8	46	94	1.3	5	80	30.542	79.75
2021-07-06	23	Hangzhou	102	41	79	0.2	44	50	31.375	66.792
2021-07-07	7	Hangzhou	100	110	36	0.4	90	45	31.583	68.875
2021-07-08	14	Hangzhou	55	72	112	0.8	68	32	29.25	76.042
2021-07-09	17	Hangzhou	50	104	62	1.8	116	88	26.75	79.375
2021-07-10	17	Hangzhou	1	100	54	1.3	34	50	28.292	79.75
2021-07-11	24	Hangzhou	103	77	91	1.6	70	77	31.25	72.333
2021-07-12	21	Hangzhou	114	114	108	0.8	87	52	32.75	61.583
2021-07-13	27	Hangzhou	19	16	86	0.6	105	103	32.208	61.208
2021-07-14	22	Hangzhou	74	43	31	1.3	36	66	33.708	58.625
2021-07-15	19	Hangzhou	97	27	46	0.5	73	113	33.417	56.458
2021-07-16	10	Hangzhou	104	50	101	0.9	77	112	32.417	59.708
2021-07-17	23	Hangzhou	47	81	5	0.1	4	101	30.833	64.708
2021-07-18	24	Hangzhou	17	25	83	1.1	21	96	30.833	59.583
2021-07-19	20	Hangzhou	33	29	56	1.5	97	4	30.826	60.913
2021-07-20	19	Hangzhou	34	20	105	1.2	57	21	30.875	65.833
2021-07-21	15	Hangzhou	22	52	90	0.6	94	65	29.75	64.083
2021-07-22	31	Hangzhou	15	47	25	1	48	66	28.917	71.833
2021-07-23	16	Hangzhou	6	105	112	1.3	33	60	28	77.292
2021-07-24	17	Hangzhou	112	64	40	0.7	27	67	25.833	90.208
2021-07-25	11	Hangzhou	11	7	100	0.8	55	8	25.292	92.208
2021-07-26	5	Hangzhou	5	88	114	2	6	59	25.375	93.667
2021-07-27	15	Hangzhou	51	113	19	0.2	109	9	26.292	91.458
2021-07-28	19	Hangzhou	104	7	51	0.8	117	31	28.958	80.667
2021-07-29	8	Hangzhou	29	76	71	1.2	44	38	30.417	72.667
2021-07-30	15	Hangzhou	18	37	24	0.5	120	70	29.458	72.708
2021-07-31	14	Hangzhou	56	105	27	1.6	89	99	27.417	84.667
2021-08-01	7	Hangzhou	46	70	104	0.5	91	66	28.333	80.042
2021-08-02	23	Hangzhou	108	103	71	1.2	79	88	29.875	74.792
2021-08-03	13	Hangzhou	9	69	66	0.9	50	57	29.167	79.5
2021-08-04	14	Hangzhou	26	46	87	0.2	111	48	29	79.565
2021-08-05	18	Hangzhou	120	23	108	1.6	120	91	29.273	75.909
2021-08-06	12	Hangzhou	72	47	108	0.3	88	80	29.833	72.542
2021-08-07	21	Hangzhou	68	48	35	0.3	14	16	29.292	69.958
2021-08-08	15	Hangzhou	20	114	3	1.2	89	9	29.375	65.167
2021-08-09	12	Hangzhou	5	92	93	1.7	36	67	30.292	63.917
2021-08-10	24	Hangzhou	5	78	93	0.2	47	46	27.5	87.583
2021-08-11	14	Hangzhou	26	39	78	1.9	98	1	26.957	91.435
2021-08-12	11	Hangzhou	29	115	115	1.2	87	3	27.167	88.167
2021-08-13	5	Hangzhou	66	96	94	0.7	97	63	25.792	94.667
2021-08-14	13	Hangzhou	36	87	71	1.1	3	4	23.792	93.708
2021-08-15	16	Hangzhou	54	1	91	0.1	118	25	25.292	91.542
2021-08-16	9	Hangzhou	44	23	96	1.8	112	59	25.792	92.417
2021-08-17	23	Hangzhou	49	30	46	1.2	42	23	27.136	80.136
2021-08-18	15	Hangzhou	16	88	101	1.9	79	73	27.783	69.087
2021-08-19	16	Hangzhou	13	0	23	2	109	79	28.13	72.087
2021-08-20	17	Hangzhou	89	56	90	1.1	27	112	28.636	76.5
2021-08-21	7	Hangzhou	8	84	88	0.1	10	11	28.458	79.417
2021-08-22	17	Hangzhou	83	17	59	1.2	4	7	29.458	78.208
2021-08-23	24	Hangzhou	54	106	16	0.2	48	3	30.455	71.5
2021-08-24	28	Hangzhou	12	11	93	1.3	45	26	29.913	70.783
2021-08-25	21	Hangzhou	114	96	44	1.2	48	98	29.545	69.136
2021-08-26	20	Hangzhou	87	59	118	0.8	92	68	29.625	70.958
2021-08-27	16	Hangzhou	115	40	37	0.4	66	8	28.318	82.455
2021-08-28	16	Hangzhou	33	60	59	1.6	36	97	29.792	73.375
2021-08-29	25	Hangzhou	7	83	62	1.3	75	22	30.958	69.25
2021-08-30	36	Hangzhou	34	41	10	0.3	114	27	31.375	64.208
2021-08-31	23	Hangzhou	119	75	47	1.6	48	99	30.75	62.875
2021-09-01	20	Hangzhou	11	33	64	0.9	118	10	31.75	62.542
2021-09-02	15	Hangzhou	83	85	75	1.8	85	74	28.913	81.348
2021-09-03	13	Hangzhou	103	12	94	0.1	42	44	28.208	79.75
2021-09-04	23	Hangzhou	114	15	70	1.3	83	16	29.625	75.792
2021-09-05	23	Hangzhou	98	60	6	1.1	28	5	29.75	75.875
2021-09-06	20	Hangzhou	10	93	3	0.2	80	103	28.917	76.083
2021-09-07	13	Hangzhou	70	96	85	0.1	111	38	26.583	69.875
2021-09-08	20	Hangzhou	31	96	78	0.2	57	61	25.542	77.083
2021-09-09	13	Hangzhou	119	110	32	0.5	17	109	27.375	80.25
2021-09-10	8	Hangzhou	99	35	26	1	117	115	26.542	86.042
2021-09-11	11	Hangzhou	1	59	53	1.2	16	100	27.25	81.667
2021-09-12	30	Hangzhou	46	66	82	0.9	80	10	25.917	86.75
2021-09-13	16	Hangzhou	1	63	115	0	85	105	24.292	90.75
2021-09-14	11	Hangzhou	115	84	101	1.3	26	90	25.458	79.375
2021-09-15	20	Hangzhou	24	119	91	1.1	114	115	25.025	72.333
2021-09-16	21	Hangzhou	27	35	61	0.1	37	39	24.267	83.5
2021-09-17	5	Hangzhou	49	114	107	0.9	93	6	25.088	67.958
2021-09-18	14	Hangzhou	8	1	68	1.9	17	80	25.492	64.208
2021-09-19	25	Hangzhou	59	28	97	0.6	26	93	27.626	72.304
2021-09-20	36	Hangzhou	114	113	105	0.4	63	89	28.179	71.042
2021-09-21	32	Hangzhou	119	61	21	0.5	69	107	26.9	61.625
2021-09-22	12	Hangzhou	34	63	86	0.4	3	43	27.508	57.042
2021-09-23	22	Hangzhou	70	83	118	1.4	6	112	27.654	58.542
2021-09-24	22	Hangzhou	32	8	70	1.5	24	113	27.846	53.708
2021-09-25	29	Hangzhou	104	65	118	1.7	68	56	26.738	59.708
2021-09-26	19	Hangzhou	57	97	102	0.2	42	101	26.454	68.958
2021-09-27	27	Hangzhou	74	66	34	0.9	40	19	27.229	63.708
2021-09-28	22	Hangzhou	95	8	80	1.7	50	59	27.9	67.083
2021-09-29	23	Hangzhou	81	63	23	0.4	112	119	26.85	74.833
2021-09-30	28	Hangzhou	98	51	21	0.5	77	59	25.817	64.083
2021-10-01	33	Hangzhou	26	46	0.6	6	27	170	25.93	67.043
2021-10-02	33	Hangzhou	32	56	0.6	6	29	184	27.108	68
2021-10-03	13	Hangzhou	24	42	0.5	6	21	155	28.713	56.792
2021-10-04	31	Hangzhou	17	35	0.4	6	20	113	28.396	57.583
2021-10-05	33	Hangzhou	18	42	0.4	6	20	147	28.071	58.583
2021-10-06	30	Hangzhou	20	46	0.5	6	28	76	25.933	76.208
2021-10-07	39	Hangzhou	26	46	0.5	6	23	101	26.729	76.583
2021-10-08	18	Hangzhou	25	45	0.7	7	28	106	25.626	75.913
2021-10-09	21	Hangzhou	14	31	0.5	6	24	108	27.554	75.458
2021-10-10	11	Hangzhou	17	37	0.6	5	29	58	24.896	84.875
2021-10-11	22	Hangzhou	5	12	0.6	5	19	57	18.933	92.75
2021-10-12	24	Hangzhou	11	30	0.6	6	27	64	18.908	81.792
2021-10-13	13	Hangzhou	12	22	0.7	5	34	49	20.017	92.792
2021-10-14	17	Hangzhou	20	38	0.7	6	35	43	23.775	89.833
2021-10-15	17	Hangzhou	9	21	0.7	5	26	64	22.825	84.917
2021-10-16	16	Hangzhou	5	11	0.5	5	18	68	16.304	89.042
2021-10-17	21	Hangzhou	9	26	0.5	6	24	77	14.248	64.522
2021-10-18	21	Hangzhou	19	45	0.6	6	44	46	14.671	76.208
2021-10-19	28	Hangzhou	26	57	0.7	8	39	86	16.321	66.917
2021-10-20	15	Hangzhou	14	28	0.5	6	31	58	12.846	82.958
2021-10-21	19	Hangzhou	12	21	0.6	6	25	60	12.575	79.917
2021-10-22	20	Hangzhou	46	78	0.8	8	37	112	14.238	63.042
2021-10-23	27	Hangzhou	33	60	0.7	8	51	113	16.296	60.083
2021-10-24	28	Hangzhou	25	50	0.5	8	52	95	16.95	67.292
2021-10-25	32	Hangzhou	25	53	0.5	7	48	84	16.579	70.292
2021-10-26	26	Hangzhou	32	66	0.6	7	51	88	17.308	76.583
2021-10-27	23	Hangzhou	37	74	0.7	8	55	96	18.196	72.792
2021-10-28	19	Hangzhou	30	61	0.6	8	49	80	17.854	63.167
2021-10-29	20	Hangzhou	29	63	0.6	7	56	102	18.083	63.583
2021-10-30	24	Hangzhou	41	83	0.8	8	57	147	17.971	61.167
2021-10-31	31	Hangzhou	37	70	0.7	7	52	103	17.758	69.292
2021-11-01	27	Hangzhou	65	76	6	0.9	31	37	19.468	61.045
2021-11-02	27	Hangzhou	22	85	112	0.1	84	72	18.004	77.875
2021-11-03	22	Hangzhou	79	59	58	0.4	13	26	17.1	75.333
2021-11-04	25	Hangzhou	95	35	108	0.5	89	10	16.95	84.208
2021-11-05	29	Hangzhou	75	10	109	0.5	111	44	19.296	86.565
2021-11-06	15	Hangzhou	118	11	68	1.6	2	101	19.038	91.667
2021-11-07	28	Hangzhou	66	96	113	1.1	74	80	16.05	83.833
2021-11-08	20	Hangzhou	106	27	25	0.2	112	31	7.538	53.042
2021-11-09	20	Hangzhou	88	30	119	0.7	49	45	8.888	49.875
2021-11-10	26	Hangzhou	57	108	113	1	40	103	12.617	40.958
2021-11-11	27	Hangzhou	65	85	110	1.5	1	53	12.508	51.25
2021-11-12	22	Hangzhou	46	54	43	0.9	66	32	13.75	41.125
2021-11-13	29	Hangzhou	47	110	5	0.9	73	99	13.338	59.5
2021-11-14	20	Hangzhou	25	39	27	1.7	14	53	14.7	60.19
2021-11-15	31	Hangzhou	44	32	28	1.5	85	48	14.342	59.333
2021-11-16	40	Hangzhou	1	86	25	1.5	36	7	15.1	65.708
2021-11-17	28	Hangzhou	88	114	55	1.7	80	52	13.8	87.708
2021-11-18	20	Hangzhou	29	116	68	1.9	88	120	13.775	87.958
2021-11-19	13	Hangzhou	16	57	3	1.9	60	3	16.283	80.375
2021-11-20	23	Hangzhou	71	86	109	1.3	85	57	16.958	75.958
2021-11-21	20	Hangzhou	51	2	61	0.4	51	107	15.317	88.583
2021-11-22	18	Hangzhou	108	26	14	1.4	37	8	9.525	53
2021-11-23	24	Hangzhou	22	52	4	0.4	36	15	6.583	43.042
2021-11-24	18	Hangzhou	6	105	24	1.4	55	49	8.779	60.875
2021-11-25	22	Hangzhou	37	23	8	1.7	37	11	11.35	58.75
2021-11-26	19	Hangzhou	69	3	65	0.7	80	79	11.813	59.667
2021-11-27	27	Hangzhou	112	26	53	0.6	44	94	12.296	68.417
2021-11-28	27	Hangzhou	23	69	36	0	99	106	13.175	79.125
2021-11-29	22	Hangzhou	63	5	73	0.8	74	41	14.079	92.583
2021-11-30	20	Hangzhou	94	96	86	1.8	91	8	11.667	56.625
2021-12-01	21	Hangzhou	101	115	55	0.8	20	8	7.204	40.458
2021-12-02	21	Hangzhou	110	79	89	0.9	99	77	6.479	55.75
2021-12-03	12	Hangzhou	96	14	102	1.8	70	36	9.175	53.167
2021-12-04	22	Hangzhou	61	103	75	0.9	52	43	9.35	54.292
2021-12-05	27	Hangzhou	67	53	38	1.6	115	35	9.975	65.708
2021-12-06	15	Hangzhou	16	18	67	1.5	7	43	11.058	66.833
2021-12-07	18	Hangzhou	36	14	2	0.8	35	116	10.629	64.583
2021-12-08	13	Hangzhou	62	92	100	1.4	68	28	11.533	73.708
2021-12-09	20	Hangzhou	1	2	37	1.5	62	61	12.992	71.417
2021-12-10	8	Hangzhou	46	67	11	0.9	58	58	11.921	73.042
2021-12-11	22	Hangzhou	24	106	17	1.6	67	118	11.875	79.292
2021-12-12	15	Hangzhou	41	23	74	0.8	120	49	9.888	83.375
2021-12-13	12	Hangzhou	65	48	13	1.8	16	56	8.4	59.417
2021-12-14	16	Hangzhou	115	30	64	1	63	109	7.742	71.125
2021-12-15	17	Hangzhou	22	94	39	0.9	97	59	12.496	76.542
2021-12-16	18	Hangzhou	40	105	65	1.6	108	29	12.279	88.708
2021-12-17	15	Hangzhou	91	19	47	1.9	27	70	9.096	57.167
2021-12-18	25	Hangzhou	84	12	78	1.1	120	38	4.496	50.783
2021-12-19	13	Hangzhou	23	90	20	1.7	68	78	7.58	51.9
2021-12-20	13	Hangzhou	80	103	48	2	78	19	9.279	60
2021-12-21	15	Hangzhou	107	101	75	1.2	39	86	12.288	63.167
2021-12-22	15	Hangzhou	59	62	83	1.7	106	28	9.767	74
2021-12-23	18	Hangzhou	13	97	12	1.6	55	28	10.446	76.958
2021-12-24	10	Hangzhou	68	100	95	0.8	90	55	10.9	79.083
2021-12-25	11	Hangzhou	119	103	41	0.2	37	10	3.313	71.833
2021-12-26	21	Hangzhou	43	24	32	0.3	55	25	0.567	43.667
2021-12-27	17	Hangzhou	118	99	17	1.3	29	91	1.558	28.917
2021-12-28	17	Hangzhou	53	68	64	0.1	21	58	3.017	50.667
2021-12-29	8	Hangzhou	46	100	11	1.1	110	31	7.679	50.5
2021-12-30	14	Hangzhou	31	21	93	1.1	94	22	6.746	34.75
2021-12-31	15	Hangzhou	88	114	34	0.6	79	3	6.233	44.458

## Sheet: Supplementary Table 2
Supplementary Table 2：Outpatient data
date	gender	age	city
2019-11-25	female	62	hangzhou
2019-11-25	female	33	hangzhou
2019-11-25	female	24	hangzhou
2019-11-25	female	33	hangzhou
2019-11-25	female	27	hangzhou
2019-11-25	male	18	hangzhou
2019-11-25	male	32	hangzhou
2019-11-25	male	7	hangzhou
2019-11-26	female	32	hangzhou
2019-11-26	female	3	hangzhou
2019-11-26	male	27	hangzhou
2019-11-26	male	12	hangzhou
2019-11-26	male	41	hangzhou
2019-11-26	male	27	hangzhou
2019-11-26	male	58	hangzhou
2019-11-26	male	3	hangzhou
2019-11-26	female	35	hangzhou
2019-11-26	male	8	hangzhou
2019-11-27	male	36	hangzhou
2019-11-27	female	14	hangzhou
2019-11-27	male	2	hangzhou
2019-11-27	male	8	hangzhou
2019-11-27	male	20	hangzhou
2019-11-27	female	19	hangzhou
2019-11-27	male	32	hangzhou
2019-11-27	male	21	hangzhou
2019-11-28	female	26	hangzhou
2019-11-28	male	10	hangzhou
2019-11-28	male	80	hangzhou
2019-11-28	female	36	hangzhou
2019-11-28	male	10	hangzhou
2019-11-28	male	26	hangzhou
2019-11-28	male	12	hangzhou
2019-11-28	male	73	hangzhou
2019-11-28	female	38	hangzhou
2019-11-29	female	48	hangzhou
2019-11-29	female	8	hangzhou
2019-11-29	male	21	hangzhou
2019-11-29	female	25	hangzhou
2019-11-29	female	30	hangzhou
2019-11-29	female	7	hangzhou
2019-11-29	female	20	hangzhou
2019-11-29	male	61	hangzhou
2019-11-29	male	5	hangzhou
2019-11-29	male	45	hangzhou
2019-11-29	female	45	hangzhou
2019-11-29	female	40	hangzhou
2019-11-30	female	13	hangzhou
2019-11-30	male	30	hangzhou
2019-11-30	female	31	hangzhou
2019-11-30	female	74	hangzhou
2019-11-30	female	12	hangzhou
2019-11-30	male	5	hangzhou
2019-11-30	male	52	hangzhou
2019-11-30	female	12	hangzhou
2019-11-30	female	8	hangzhou
2019-11-30	male	5	hangzhou
2019-11-30	male	15	hangzhou
2019-11-30	female	11	hangzhou
2019-11-30	male	6	hangzhou
2019-11-30	male	31	hangzhou
2019-11-30	female	57	hangzhou
2019-12-01	female	32	hangzhou
2019-12-01	female	24	hangzhou
2019-12-01	female	37	hangzhou
2019-12-01	male	12	hangzhou
2019-12-01	male	6	hangzhou
2019-12-01	female	49	hangzhou
2019-12-01	male	41	hangzhou
2019-12-01	female	11	hangzhou
2019-12-01	male	11	hangzhou
2019-12-01	male	4	hangzhou
2019-12-01	male	11	hangzhou
2019-12-01	female	31	hangzhou
2019-12-01	male	36	hangzhou
2019-12-01	female	3	hangzhou
2019-12-01	female	56	hangzhou
2019-12-01	male	25	hangzhou
2019-12-01	female	47	hangzhou
2019-12-01	male	39	hangzhou
2019-12-01	male	35	hangzhou
2019-12-01	female	30	hangzhou
2019-12-01	male	31	hangzhou
2019-12-01	female	37	hangzhou
2019-12-01	female	12	hangzhou
2019-12-01	male	47	hangzhou
2019-12-01	female	6	hangzhou
2019-12-02	female	64	hangzhou
2019-12-02	male	17	hangzhou
2019-12-02	male	2	hangzhou
2019-12-02	male	7	hangzhou
2019-12-02	female	5	hangzhou
2019-12-02	male	6	hangzhou
2019-12-02	female	3	hangzhou
2019-12-02	female	25	hangzhou
2019-12-02	male	39	hangzhou
2019-12-02	female	32	hangzhou
2019-12-02	female	54	hangzhou
2019-12-02	female	41	hangzhou
2019-12-02	male	34	hangzhou
2019-12-02	female	47	hangzhou
2019-12-02	male	21	hangzhou
2019-12-02	female	51	hangzhou
2019-12-03	female	44	hangzhou
2019-12-03	female	49	hangzhou
2019-12-03	female	34	hangzhou
2019-12-03	male	3	hangzhou
2019-12-03	female	41	hangzhou
2019-12-03	female	41	hangzhou
2019-12-03	male	23	hangzhou
2019-12-03	female	27	hangzhou
2019-12-03	male	21	hangzhou
2019-12-03	male	24	hangzhou
2019-12-03	male	12	hangzhou
2019-12-03	female	38	hangzhou
2019-12-03	female	37	hangzhou
2019-12-03	female	26	hangzhou
2019-12-04	male	43	hangzhou
2019-12-04	male	41	hangzhou
2019-12-04	female	39	hangzhou
2019-12-04	female	3	hangzhou
2019-12-04	female	41	hangzhou
2019-12-04	male	3	hangzhou
2019-12-04	female	44	hangzhou
2019-12-04	female	26	hangzhou
2019-12-04	female	31	hangzhou
2019-12-04	female	50	hangzhou
2019-12-04	female	34	hangzhou
2019-12-04	male	34	hangzhou
2019-12-04	male	51	hangzhou
2019-12-04	female	38	hangzhou
2019-12-04	male	66	hangzhou
2019-12-05	female	68	hangzhou
2019-12-05	female	22	hangzhou
2019-12-05	male	10	hangzhou
2019-12-05	female	55	hangzhou
2019-12-05	female	26	hangzhou
2019-12-05	female	41	hangzhou
2019-12-05	female	34	hangzhou
2019-12-05	male	29	hangzhou
2019-12-06	female	51	hangzhou
2019-12-06	female	78	hangzhou
2019-12-06	male	4	hangzhou
2019-12-06	male	39	hangzhou
2019-12-06	female	3	hangzhou
2019-12-06	female	30	hangzhou
2019-12-06	female	34	hangzhou
2019-12-06	female	37	hangzhou
2019-12-06	male	26	hangzhou
2019-12-06	male	45	hangzhou
2019-12-06	female	2	hangzhou
2019-12-07	female	35	hangzhou
2019-12-07	female	22	hangzhou
2019-12-07	female	6	hangzhou
2019-12-07	male	34	hangzhou
2019-12-07	male	14	hangzhou
2019-12-07	male	36	hangzhou
2019-12-07	male	1	hangzhou
2019-12-07	male	10	hangzhou
2019-12-07	male	16	hangzhou
2019-12-07	female	19	hangzhou
2019-12-07	female	55	hangzhou
2019-12-07	male	13	hangzhou
2019-12-07	male	53	hangzhou
2019-12-07	female	30	hangzhou
2019-12-07	male	22	hangzhou
2019-12-07	male	8	hangzhou
2019-12-07	male	5	hangzhou
2019-12-07	female	33	hangzhou
2019-12-07	male	6	hangzhou
2019-12-08	female	31	hangzhou
2019-12-08	female	4	hangzhou
2019-12-08	female	25	hangzhou
2019-12-08	male	42	hangzhou
2019-12-08	male	17	hangzhou
2019-12-08	male	26	hangzhou
2019-12-08	male	3	hangzhou
2019-12-08	male	29	hangzhou
2019-12-08	male	6	hangzhou
2019-12-08	male	41	hangzhou
2019-12-08	female	15	hangzhou
2019-12-08	female	69	hangzhou
2019-12-08	male	72	hangzhou
2019-12-08	female	5	hangzhou
2019-12-08	female	24	hangzhou
2019-12-08	male	9	hangzhou
2019-12-08	male	12	hangzhou
2019-12-08	female	23	hangzhou
2019-12-08	male	6	hangzhou
2019-12-08	female	39	hangzhou
2019-12-08	female	32	hangzhou
2019-12-08	male	29	hangzhou
2019-12-09	female	29	hangzhou
2019-12-09	female	10	hangzhou
2019-12-09	male	7	hangzhou
2019-12-09	female	66	hangzhou
2019-12-09	male	20	hangzhou
2019-12-09	female	6	hangzhou
2019-12-09	male	47	hangzhou
2019-12-09	female	38	hangzhou
2019-12-09	female	35	hangzhou
2019-12-09	female	50	hangzhou
2019-12-09	male	55	hangzhou
2019-12-09	male	5	hangzhou
2019-12-09	male	36	hangzhou
2019-12-09	female	71	hangzhou
2019-12-09	male	54	hangzhou
2019-12-09	female	27	hangzhou
2019-12-09	male	25	hangzhou
2019-12-09	female	50	hangzhou
2019-12-09	female	34	hangzhou
2019-12-09	male	5	hangzhou
2019-12-09	female	4 month old	hangzhou
2019-12-10	female	29	hangzhou
2019-12-10	female	45	hangzhou
2019-12-10	male	11	hangzhou
2019-12-10	male	53	hangzhou
2019-12-10	female	29	hangzhou
2019-12-10	female	29	hangzhou
2019-12-10	male	30	hangzhou
2019-12-10	male	57	hangzhou
2019-12-10	female	23	hangzhou
2019-12-10	male	36	hangzhou
2019-12-10	female	28	hangzhou
2019-12-10	female	51	hangzhou
2019-12-10	female	30	hangzhou
2019-12-10	male	11	hangzhou
2019-12-10	female	32	hangzhou
2019-12-10	female	38	hangzhou
2019-12-10	female	57	hangzhou
2019-12-10	female	19	hangzhou
2019-12-10	male	48	hangzhou
2019-12-10	female	43	hangzhou
2019-12-11	female	52	hangzhou
2019-12-11	female	33	hangzhou
2019-12-11	male	9	hangzhou
2019-12-11	male	52	hangzhou
2019-12-11	male	6	hangzhou
2019-12-11	female	40	hangzhou
2019-12-11	male	50	hangzhou
2019-12-11	female	31	hangzhou
2019-12-11	male	9	hangzhou
2019-12-11	female	12	hangzhou
2019-12-11	female	52	hangzhou
2019-12-11	female	40	hangzhou
2019-12-12	male	31	hangzhou
2019-12-12	male	25	hangzhou
2019-12-12	male	37	hangzhou
2019-12-12	male	1	hangzhou
2019-12-12	male	8	hangzhou
2019-12-12	male	39	hangzhou
2019-12-12	female	38	hangzhou
2019-12-12	male	22	hangzhou
2019-12-12	female	33	hangzhou
2019-12-12	female	52	hangzhou
2019-12-12	female	26	hangzhou
2019-12-12	male	29	hangzhou
2019-12-12	male	24	hangzhou
2019-12-12	male	43	hangzhou
2019-12-12	male	19	hangzhou
2019-12-12	female	16	hangzhou
2019-12-12	female	29	hangzhou
2019-12-12	female	29	hangzhou
2019-12-12	female	25	hangzhou
2019-12-13	male	9	hangzhou
2019-12-13	male	54	hangzhou
2019-12-13	female	50	hangzhou
2019-12-13	female	36	hangzhou
2019-12-13	female	8	hangzhou
2019-12-13	female	22	hangzhou
2019-12-13	female	42	hangzhou
2019-12-13	female	59	hangzhou
2019-12-13	male	35	hangzhou
2019-12-13	female	10	hangzhou
2019-12-13	female	5	hangzhou
2019-12-13	female	38	hangzhou
2019-12-13	female	44	hangzhou
2019-12-13	male	56	hangzhou
2019-12-13	female	8	hangzhou
2019-12-13	female	27	hangzhou
2019-12-13	male	25	hangzhou
2019-12-13	female	30	hangzhou
2019-12-14	male	6	hangzhou
2019-12-14	male	17	hangzhou
2019-12-14	male	12	hangzhou
2019-12-14	male	11	hangzhou
2019-12-14	female	55	hangzhou
2019-12-14	male	7	hangzhou
2019-12-14	female	25	hangzhou
2019-12-14	male	8	hangzhou
2019-12-14	male	6	hangzhou
2019-12-14	female	37	hangzhou
2019-12-14	male	5	hangzhou
2019-12-14	female	41	hangzhou
2019-12-14	male	7	hangzhou
2019-12-14	male	48	hangzhou
2019-12-14	female	11	hangzhou
2019-12-14	male	8	hangzhou
2019-12-14	male	9	hangzhou
2019-12-14	male	33	hangzhou
2019-12-14	male	47	hangzhou
2019-12-14	male	12	hangzhou
2019-12-14	male	7	hangzhou
2019-12-14	male	27	hangzhou
2019-12-15	male	38	hangzhou
2019-12-15	female	33	hangzhou
2019-12-15	female	27	hangzhou
2019-12-15	female	54	hangzhou
2019-12-15	male	11	hangzhou
2019-12-15	female	12	hangzhou
2019-12-15	female	12	hangzhou
2019-12-15	male	47	hangzhou
2019-12-15	female	10	hangzhou
2019-12-15	female	15	hangzhou
2019-12-15	male	29	hangzhou
2019-12-15	male	60	hangzhou
2019-12-15	male	12	hangzhou
2019-12-15	female	10	hangzhou
2019-12-15	male	41	hangzhou
2019-12-15	male	31	hangzhou
2019-12-15	male	66	hangzhou
2019-12-15	female	14	hangzhou
2019-12-16	female	41	hangzhou
2019-12-16	female	27	hangzhou
2019-12-16	male	66	hangzhou
2019-12-16	female	6	hangzhou
2019-12-16	female	23	hangzhou
2019-12-16	male	61	hangzhou
2019-12-16	female	5	hangzhou
2019-12-16	female	37	hangzhou
2019-12-16	female	21	hangzhou
2019-12-16	female	18	hangzhou
2019-12-16	female	5	hangzhou
2019-12-16	female	2	hangzhou
2019-12-16	male	5	hangzhou
2019-12-16	male	37	hangzhou
2019-12-16	male	4	hangzhou
2019-12-16	female	32	hangzhou
2019-12-16	female	65	hangzhou
2019-12-16	male	34	hangzhou
2019-12-16	female	10	hangzhou
2019-12-16	male	42	hangzhou
2019-12-16	female	19	hangzhou
2019-12-16	male	37	hangzhou
2019-12-16	female	15	hangzhou
2019-12-16	female	32	hangzhou
2019-12-16	male	14	hangzhou
2019-12-17	male	42	hangzhou
2019-12-17	female	47	hangzhou
2019-12-17	male	50	hangzhou
2019-12-17	female	33	hangzhou
2019-12-17	male	6	hangzhou
2019-12-17	female	27	hangzhou
2019-12-17	female	41	hangzhou
2019-12-17	male	38	hangzhou
2019-12-17	male	60	hangzhou
2019-12-17	female	28	hangzhou
2019-12-17	female	14	hangzhou
2019-12-17	female	27	hangzhou
2019-12-17	male	27	hangzhou
2019-12-17	male	9	hangzhou
2019-12-17	male	36	hangzhou
2019-12-17	male	26	hangzhou
2019-12-18	female	55	hangzhou
2019-12-18	male	26	hangzhou
2019-12-18	male	31	hangzhou
2019-12-18	female	4	hangzhou
2019-12-18	female	53	hangzhou
2019-12-18	male	40	hangzhou
2019-12-18	female	22	hangzhou
2019-12-18	male	36	hangzhou
2019-12-18	male	7	hangzhou
2019-12-19	female	72	hangzhou
2019-12-19	male	5	hangzhou
2019-12-19	male	45	hangzhou
2019-12-19	male	35	hangzhou
2019-12-19	female	12	hangzhou
2019-12-19	female	39	hangzhou
2019-12-19	male	5	hangzhou
2019-12-19	female	35	hangzhou
2019-12-19	female	35	hangzhou
2019-12-19	male	29	hangzhou
2019-12-19	male	31	hangzhou
2019-12-20	female	50	hangzhou
2019-12-20	female	53	hangzhou
2019-12-20	female	66	hangzhou
2019-12-20	female	48	hangzhou
2019-12-20	female	24	hangzhou
2019-12-20	female	22	hangzhou
2019-12-20	female	53	hangzhou
2019-12-20	male	45	hangzhou
2019-12-20	male	21	hangzhou
2019-12-20	male	57	hangzhou
2019-12-20	male	13	hangzhou
2019-12-21	female	30	hangzhou
2019-12-21	female	42	hangzhou
2019-12-21	female	63	hangzhou
2019-12-21	female	43	hangzhou
2019-12-21	female	31	hangzhou
2019-12-21	female	11	hangzhou
2019-12-21	female	10	hangzhou
2019-12-21	male	32	hangzhou
2019-12-21	male	11	hangzhou
2019-12-21	male	49	hangzhou
2019-12-21	female	43	hangzhou
2019-12-21	male	11	hangzhou
2019-12-21	male	14	hangzhou
2019-12-21	female	25	hangzhou
2019-12-21	male	31	hangzhou
2019-12-21	female	11	hangzhou
2019-12-21	male	15	hangzhou
2019-12-21	male	58	hangzhou
2019-12-21	female	48	hangzhou
2019-12-21	male	4	hangzhou
2019-12-21	female	27	hangzhou
2019-12-22	male	39	hangzhou
2019-12-22	male	3	hangzhou
2019-12-22	male	30	hangzhou
2019-12-22	female	23	hangzhou
2019-12-22	female	12	hangzhou
2019-12-22	male	65	hangzhou
2019-12-22	male	13	hangzhou
2019-12-22	male	10	hangzhou
2019-12-22	female	23	hangzhou
2019-12-22	male	19	hangzhou
2019-12-23	female	51	hangzhou
2019-12-23	male	36	hangzhou
2019-12-23	female	70	hangzhou
2019-12-23	female	31	hangzhou
2019-12-23	male	42	hangzhou
2019-12-23	male	48	hangzhou
2019-12-23	female	56	hangzhou
2019-12-23	female	62	hangzhou
2019-12-23	female	5	hangzhou
2019-12-23	male	3	hangzhou
2019-12-23	female	53	hangzhou
2019-12-23	female	28	hangzhou
2019-12-24	male	9	hangzhou
2019-12-24	female	37	hangzhou
2019-12-24	female	50	hangzhou
2019-12-24	female	17	hangzhou
2019-12-24	male	54	hangzhou
2019-12-24	female	66	hangzhou
2019-12-24	female	38	hangzhou
2019-12-24	female	61	hangzhou
2019-12-24	female	57	hangzhou
2019-12-24	female	71	hangzhou
2019-12-24	male	50	hangzhou
2019-12-25	female	39	hangzhou
2019-12-25	male	9	hangzhou
2019-12-25	male	4	hangzhou
2019-12-25	female	24	hangzhou
2019-12-25	female	22	hangzhou
2019-12-25	female	20	hangzhou
2019-12-25	male	2	hangzhou
2019-12-26	female	35	hangzhou
2019-12-26	female	27	hangzhou
2019-12-26	male	27	hangzhou
2019-12-26	female	22	hangzhou
2019-12-26	female	70	hangzhou
2019-12-26	male	12	hangzhou
2019-12-26	female	21	hangzhou
2019-12-26	female	37	hangzhou
2019-12-26	female	41	hangzhou
2019-12-26	male	63	hangzhou
2019-12-26	female	10	hangzhou
2019-12-27	male	8	hangzhou
2019-12-27	female	47	hangzhou
2019-12-27	male	5	hangzhou
2019-12-27	male	48	hangzhou
2019-12-27	male	23	hangzhou
2019-12-27	female	35	hangzhou
2019-12-27	male	61	hangzhou
2019-12-27	female	51	hangzhou
2019-12-27	female	75	hangzhou
2019-12-27	male	38	hangzhou
2019-12-28	male	53	hangzhou
2019-12-28	female	36	hangzhou
2019-12-28	male	13	hangzhou
2019-12-28	female	19	hangzhou
2019-12-28	male	30	hangzhou
2019-12-28	female	27	hangzhou
2019-12-28	male	25	hangzhou
2019-12-28	male	32	hangzhou
2019-12-28	male	37	hangzhou
2019-12-28	male	13	hangzhou
2019-12-29	male	7	hangzhou
2019-12-29	female	32	hangzhou
2019-12-29	male	50	hangzhou
2019-12-29	female	69	hangzhou
2019-12-29	female	37	hangzhou
2019-12-29	female	52	hangzhou
2019-12-29	male	71	hangzhou
2019-12-29	male	49	hangzhou
2019-12-29	female	43	hangzhou
2019-12-29	female	55	hangzhou
2019-12-29	female	37	hangzhou
2019-12-29	female	7	hangzhou
2019-12-29	female	8	hangzhou
2019-12-29	male	26	hangzhou
2019-12-29	male	31	hangzhou
2019-12-29	male	6	hangzhou
2019-12-29	male	28	hangzhou
2019-12-29	male	41	hangzhou
2019-12-29	male	7	hangzhou
2019-12-30	male	24	hangzhou
2019-12-30	female	3	hangzhou
2019-12-30	female	51	hangzhou
2019-12-30	male	72	hangzhou
2019-12-30	male	10	hangzhou
2019-12-30	male	48	hangzhou
2019-12-30	female	5	hangzhou
2019-12-30	female	63	hangzhou
2019-12-30	female	14	hangzhou
2019-12-30	male	34	hangzhou
2019-12-30	male	35	hangzhou
2019-12-30	male	3	hangzhou
2019-12-30	male	30	hangzhou
2019-12-31	male	19	hangzhou
2019-12-31	female	53	hangzhou
2019-12-31	female	21	hangzhou
2019-12-31	male	44	hangzhou
2019-12-31	male	62	hangzhou
2019-12-31	male	37	hangzhou
2019-12-31	female	40	hangzhou
2019-12-31	female	57	hangzhou
2019-12-31	male	55	hangzhou
2019-12-31	male	7	hangzhou
2019-12-31	female	35	hangzhou
2020-02-04	female	53	hangzhou
2020-02-03	male	63	hangzhou
2020-02-02	female	3	hangzhou
2020-02-02	male	40	hangzhou
2020-02-01	male	31	hangzhou
2020-02-01	female	29	hangzhou
2020-02-01	male	72	hangzhou
2020-01-29	female	6	hangzhou
2020-01-28	male	3	hangzhou
2020-01-28	female	45	hangzhou
2020-01-28	female	35	hangzhou
2020-01-28	male	9	hangzhou
2020-01-26	female	28	hangzhou
2020-01-24	male	65	hangzhou
2020-01-24	male	71	hangzhou
2020-01-24	female	66	hangzhou
2020-01-23	male	51	hangzhou
2020-01-23	female	34	hangzhou
2020-01-22	male	5	hangzhou
2020-01-22	male	10	hangzhou
2020-01-22	female	52	hangzhou
2020-01-22	male	50	hangzhou
2020-01-22	female	51	hangzhou
2020-01-22	female	37	hangzhou
2020-01-22	female	49	hangzhou
2020-01-22	male	44	hangzhou
2020-01-22	female	31	hangzhou
2020-01-22	male	63	hangzhou
2020-01-22	male	71	hangzhou
2020-01-21	male	60	hangzhou
2020-01-21	female	12	hangzhou
2020-01-21	female	79	hangzhou
2020-01-21	male	39	hangzhou
2020-01-21	male	14	hangzhou
2020-01-21	male	28	hangzhou
2020-01-21	male	58	hangzhou
2020-01-21	male	7	hangzhou
2020-01-21	male	40	hangzhou
2020-01-21	male	39	hangzhou
2020-01-21	female	10	hangzhou
2020-01-21	male	13	hangzhou
2020-01-21	male	74	hangzhou
2020-01-21	male	62	hangzhou
2020-01-21	female	34	hangzhou
2020-01-21	male	43	hangzhou
2020-01-21	male	49	hangzhou
2020-01-21	female	19	hangzhou
2020-01-21	male	19	hangzhou
2020-01-20	female	17	hangzhou
2020-01-20	male	4	hangzhou
2020-01-20	male	62	hangzhou
2020-01-20	female	35	hangzhou
2020-01-20	female	42	hangzhou
2020-01-20	male	19	hangzhou
2020-01-20	female	56	hangzhou
2020-01-20	female	8	hangzhou
2020-01-20	female	38	hangzhou
2020-01-20	male	7	hangzhou
2020-01-20	female	50	hangzhou
2020-01-20	female	10	hangzhou
2020-01-20	male	10	hangzhou
2020-01-20	male	45	hangzhou
2020-01-20	male	8	hangzhou
2020-01-20	female	59	hangzhou
2020-01-20	male	67	hangzhou
2020-01-20	male	13	hangzhou
2020-01-20	male	23	hangzhou
2020-01-20	female	14	hangzhou
2020-01-20	female	19	hangzhou
2020-01-20	male	35	hangzhou
2020-01-20	female	7	hangzhou
2020-01-20	female	74	hangzhou
2020-01-19	female	14	hangzhou
2020-01-19	male	7	hangzhou
2020-01-19	female	30	hangzhou
2020-01-19	female	33	hangzhou
2020-01-19	male	38	hangzhou
2020-01-19	female	62	hangzhou
2020-01-19	male	52	hangzhou
2020-01-19	male	9	hangzhou
2020-01-19	female	5	hangzhou
2020-01-19	male	21	hangzhou
2020-01-19	male	37	hangzhou
2020-01-18	male	24	hangzhou
2020-01-18	female	71	hangzhou
2020-01-18	male	16	hangzhou
2020-01-18	female	36	hangzhou
2020-01-18	female	10	hangzhou
2020-01-18	female	5	hangzhou
2020-01-18	female	26	hangzhou
2020-01-18	female	4	hangzhou
2020-01-18	female	45	hangzhou
2020-01-18	male	3	hangzhou
2020-01-18	male	16	hangzhou
2020-01-18	male	33	hangzhou
2020-01-18	female	38	hangzhou
2020-01-17	male	3	hangzhou
2020-01-17	male	42	hangzhou
2020-01-17	female	33	hangzhou
2020-01-17	female	6	hangzhou
2020-01-17	female	23	hangzhou
2020-01-17	male	50	hangzhou
2020-01-17	male	16	hangzhou
2020-01-17	female	25	hangzhou
2020-01-16	female	20	hangzhou
2020-01-16	male	43	hangzhou
2020-01-16	female	48	hangzhou
2020-01-16	female	47	hangzhou
2020-01-16	female	20	hangzhou
2020-01-16	male	62	hangzhou
2020-01-16	female	48	hangzhou
2020-01-16	female	41	hangzhou
2020-01-16	female	47	hangzhou
2020-01-16	male	8	hangzhou
2020-01-15	female	12	hangzhou
2020-01-15	male	45	hangzhou
2020-01-15	male	6	hangzhou
2020-01-15	male	62	hangzhou
2020-01-15	female	30	hangzhou
2020-01-15	female	21	hangzhou
2020-01-14	male	8	hangzhou
2020-01-14	female	43	hangzhou
2020-01-14	female	33	hangzhou
2020-01-14	male	13	hangzhou
2020-01-14	male	48	hangzhou
2020-01-14	female	29	hangzhou
2020-01-14	male	49	hangzhou
2020-01-14	male	14	hangzhou
2020-01-14	female	47	hangzhou
2020-01-14	female	32	hangzhou
2020-01-14	male	14	hangzhou
2020-01-14	male	55	hangzhou
2020-01-14	male	10	hangzhou
2020-01-14	female	54	hangzhou
2020-01-13	male	49	hangzhou
2020-01-13	male	7	hangzhou
2020-01-13	female	10	hangzhou
2020-01-13	female	31	hangzhou
2020-01-13	male	39	hangzhou
2020-01-13	male	2	hangzhou
2020-01-13	male	8	hangzhou
2020-01-13	male	34	hangzhou
2020-01-13	female	50	hangzhou
2020-01-13	female	9	hangzhou
2020-01-13	male	9	hangzhou
2020-01-13	female	3	hangzhou
2020-01-13	female	45	hangzhou
2020-01-13	male	23	hangzhou
2020-01-13	male	7	hangzhou
2020-01-13	male	71	hangzhou
2020-01-13	female	27	hangzhou
2020-01-13	male	22	hangzhou
2020-01-13	female	27	hangzhou
2020-01-13	male	31	hangzhou
2020-01-12	male	44	hangzhou
2020-01-12	female	25	hangzhou
2020-01-12	female	46	hangzhou
2020-01-12	female	26	hangzhou
2020-01-12	female	10	hangzhou
2020-01-12	male	15	hangzhou
2020-01-12	male	13	hangzhou
2020-01-12	male	11	hangzhou
2020-01-12	female	3	hangzhou
2020-01-12	male	3	hangzhou
2020-01-12	male	53	hangzhou
2020-01-12	male	7	hangzhou
2020-01-12	female	33	hangzhou
2020-01-11	male	46	hangzhou
2020-01-11	female	57	hangzhou
2020-01-11	male	8	hangzhou
2020-01-11	female	63	hangzhou
2020-01-11	male	11	hangzhou
2020-01-11	male	36	hangzhou
2020-01-11	male	34	hangzhou
2020-01-11	female	33	hangzhou
2020-01-11	female	11	hangzhou
2020-01-11	female	20	hangzhou
2020-01-11	female	40	hangzhou
2020-01-11	male	4	hangzhou
2020-01-11	female	25	hangzhou
2020-01-11	male	10	hangzhou
2020-01-10	female	31	hangzhou
2020-01-10	female	82	hangzhou
2020-01-10	male	6	hangzhou
2020-01-10	male	35	hangzhou
2020-01-10	male	64	hangzhou
2020-01-10	female	10	hangzhou
2020-01-10	female	19	hangzhou
2020-01-09	male	36	hangzhou
2020-01-09	female	6	hangzhou
2020-01-09	female	45	hangzhou
2020-01-09	female	57	hangzhou
2020-01-08	female	15	hangzhou
2020-01-08	male	37	hangzhou
2020-01-08	male	77	hangzhou
2020-01-08	male	61	hangzhou
2020-01-08	male	73	hangzhou
2020-01-08	male	38	hangzhou
2020-01-08	male	32	hangzhou
2020-01-08	female	36	hangzhou
2020-01-07	male	44	hangzhou
2020-01-07	female	27	hangzhou
2020-01-07	female	28	hangzhou
2020-01-07	male	32	hangzhou
2020-01-07	female	7	hangzhou
2020-01-07	male	23	hangzhou
2020-01-07	male	55	hangzhou
2020-01-07	male	8	hangzhou
2020-01-06	female	27	hangzhou
2020-01-06	male	42	hangzhou
2020-01-06	male	30	hangzhou
2020-01-06	female	5	hangzhou
2020-01-06	female	37	hangzhou
2020-01-06	female	31	hangzhou
2020-01-06	female	33	hangzhou
2020-01-06	male	36	hangzhou
2020-01-05	female	8	hangzhou
2020-01-05	female	48	hangzhou
2020-01-05	male	39	hangzhou
2020-01-05	male	39	hangzhou
2020-01-05	male	12	hangzhou
2020-01-05	female	23	hangzhou
2020-01-05	female	31	hangzhou
2020-01-05	female	21	hangzhou
2020-01-05	male	36	hangzhou
2020-01-05	male	23	hangzhou
2020-01-05	male	25	hangzhou
2020-01-05	female	31	hangzhou
2020-01-05	female	32	hangzhou
2020-01-05	male	32	hangzhou
2020-01-04	male	8	hangzhou
2020-01-04	male	9	hangzhou
2020-01-04	male	37	hangzhou
2020-01-04	male	40	hangzhou
2020-01-03	male	31	hangzhou
2020-01-03	female	58	hangzhou
2020-01-03	male	7	hangzhou
2020-01-02	female	57	hangzhou
2020-01-02	male	38	hangzhou
2020-01-02	male	71	hangzhou
2020-01-02	male	49	hangzhou
2020-01-02	male	34	hangzhou
2020-01-02	male	40	hangzhou
2020-01-02	female	3	hangzhou
2020-01-01	male	8	hangzhou
2020-01-01	female	30	hangzhou
2020-01-01	male	13	hangzhou
2020-01-01	female	27	hangzhou
2020-01-01	female	38	hangzhou
2020-01-01	female	13	hangzhou
2020-01-01	male	3	hangzhou
date	age	gender	city
2021-11-29	female	23	hangzhou
2021-11-29	male	34	hangzhou
2021-11-29	female	46	hangzhou
2021-11-29	male	32	hangzhou
2021-11-29	female	44	hangzhou
2021-11-29	female	44	hangzhou
2021-11-29	female	29	hangzhou
2021-11-29	male	34	hangzhou
2021-11-29	male	42	hangzhou
2021-11-29	male	40	hangzhou
2021-11-30	female	38	hangzhou
2021-11-30	male	32	hangzhou
2021-11-30	male	9	hangzhou
2021-11-30	male	3	hangzhou
2021-11-30	female	57	hangzhou
2021-11-30	male	25	hangzhou
2021-11-30	female	45	hangzhou
2021-11-30	female	28	hangzhou
2021-11-30	male	59	hangzhou
2021-11-30	male	31	hangzhou
2021-11-30	male	24	hangzhou
2021-11-30	male	10	hangzhou
2021-11-30	female	22	hangzhou
2021-11-30	male	51	hangzhou
2021-11-30	female	27	hangzhou
2021-11-30	female	27	hangzhou
2021-11-30	female	48	hangzhou
2021-11-30	male	45	hangzhou
2021-11-30	female	43	hangzhou
2021-11-30	male	8	hangzhou
2021-12-01	female	48	hangzhou
2021-12-01	male	27	hangzhou
2021-12-01	male	37	hangzhou
2021-12-01	female	66	hangzhou
2021-12-01	female	63	hangzhou
2021-12-01	female	36	hangzhou
2021-12-01	female	4	hangzhou
2021-12-01	female	40	hangzhou
2021-12-01	male	4	hangzhou
2021-12-01	female	31	hangzhou
2021-12-01	female	21	hangzhou
2021-12-01	female	20	hangzhou
2021-12-01	male	70	hangzhou
2021-12-01	male	32	hangzhou
2021-12-01	male	27	hangzhou
2021-12-01	female	37	hangzhou
2021-12-01	female	23	hangzhou
2021-12-01	female	36	hangzhou
2021-12-01	female	17	hangzhou
2021-12-01	female	31	hangzhou
2021-12-01	male	15	hangzhou
2021-12-02	female	6	hangzhou
2021-12-02	male	3	hangzhou
2021-12-02	female	3	hangzhou
2021-12-02	female	58	hangzhou
2021-12-02	female	40	hangzhou
2021-12-02	female	13	hangzhou
2021-12-02	male	14	hangzhou
2021-12-02	female	42	hangzhou
2021-12-02	male	29	hangzhou
2021-12-02	female	35	hangzhou
2021-12-02	female	58	hangzhou
2021-12-02	male	37	hangzhou
2021-12-02	male	32	hangzhou
2021-12-02	male	31	hangzhou
2021-12-02	male	15	hangzhou
2021-12-02	male	27	hangzhou
2021-12-02	male	27	hangzhou
2021-12-02	female	37	hangzhou
2021-12-02	male	38	hangzhou
2021-12-02	male	12	hangzhou
2021-12-02	female	3	hangzhou
2021-12-03	male	88	hangzhou
2021-12-03	female	57	hangzhou
2021-12-03	male	46	hangzhou
2021-12-03	male	4	hangzhou
2021-12-03	male	60	hangzhou
2021-12-03	female	21	hangzhou
2021-12-03	male	27	hangzhou
2021-12-03	female	23	hangzhou
2021-12-03	male	26	hangzhou
2021-12-03	male	37	hangzhou
2021-12-03	female	55	hangzhou
2021-12-03	male	31	hangzhou
2021-12-04	male	23	hangzhou
2021-12-04	female	28	hangzhou
2021-12-04	female	34	hangzhou
2021-12-04	female	31	hangzhou
2021-12-04	female	37	hangzhou
2021-12-04	female	54	hangzhou
2021-12-04	male	7	hangzhou
2021-12-04	male	39	hangzhou
2021-12-04	male	6	hangzhou
2021-12-04	female	6	hangzhou
2021-12-04	male	8	hangzhou
2021-12-04	male	67	hangzhou
2021-12-04	female	44	hangzhou
2021-12-04	male	9	hangzhou
2021-12-04	female	25	hangzhou
2021-12-04	female	63	hangzhou
2021-12-04	female	30	hangzhou
2021-12-04	female	31	hangzhou
2021-12-04	female	41	hangzhou
2021-12-04	female	34	hangzhou
2021-12-04	male	32	hangzhou
2021-12-04	male	35	hangzhou
2021-12-05	male	21	hangzhou
2021-12-05	male	34	hangzhou
2021-12-05	female	22	hangzhou
2021-12-05	male	36	hangzhou
2021-12-05	female	11	hangzhou
2021-12-05	male	64	hangzhou
2021-12-05	male	30	hangzhou
2021-12-05	male	8	hangzhou
2021-12-05	male	6	hangzhou
2021-12-05	male	21	hangzhou
2021-12-05	female	17	hangzhou
2021-12-05	female	34	hangzhou
2021-12-05	female	3	hangzhou
2021-12-05	male	25	hangzhou
2021-12-05	female	5	hangzhou
2021-12-05	male	50	hangzhou
2021-12-05	female	34	hangzhou
2021-12-05	female	30	hangzhou
2021-12-05	female	12	hangzhou
2021-12-05	male	29	hangzhou
2021-12-05	female	26	hangzhou
2021-12-05	female	23	hangzhou
2021-12-05	male	31	hangzhou
2021-12-05	female	7	hangzhou
2021-12-05	male	8	hangzhou
2021-12-05	male	23	hangzhou
2021-12-05	female	20	hangzhou
2021-12-06	male	54	hangzhou
2021-12-06	male	47	hangzhou
2021-12-06	male	6	hangzhou
2021-12-06	female	58	hangzhou
2021-12-06	male	21	hangzhou
2021-12-06	female	47	hangzhou
2021-12-06	male	73	hangzhou
2021-12-06	male	4	hangzhou
2021-12-06	female	28	hangzhou
2021-12-06	female	26	hangzhou
2021-12-06	male	30	hangzhou
2021-12-06	male	29	hangzhou
2021-12-06	female	19	hangzhou
2021-12-06	female	17	hangzhou
2021-12-06	male	29	hangzhou
2021-12-07	female	42	hangzhou
2021-12-07	male	1	hangzhou
2021-12-07	female	30	hangzhou
2021-12-07	female	26	hangzhou
2021-12-07	male	9	hangzhou
2021-12-07	female	26	hangzhou
2021-12-07	male	33	hangzhou
2021-12-07	female	64	hangzhou
2021-12-07	female	28	hangzhou
2021-12-07	female	26	hangzhou
2021-12-07	female	19	hangzhou
2021-12-07	male	23	hangzhou
2021-12-07	female	40	hangzhou
2021-12-07	male	58	hangzhou
2021-12-07	male	39	hangzhou
2021-12-07	male	7	hangzhou
2021-12-07	male	25	hangzhou
2021-12-07	female	29	hangzhou
2021-12-08	female	14	hangzhou
2021-12-08	female	57	hangzhou
2021-12-08	female	29	hangzhou
2021-12-08	female	30	hangzhou
2021-12-08	female	56	hangzhou
2021-12-08	male	20	hangzhou
2021-12-08	male	7	hangzhou
2021-12-08	female	11	hangzhou
2021-12-08	female	56	hangzhou
2021-12-08	female	3	hangzhou
2021-12-08	male	33	hangzhou
2021-12-08	female	67	hangzhou
2021-12-08	male	23	hangzhou
2021-12-09	female	38	hangzhou
2021-12-09	male	64	hangzhou
2021-12-09	female	42	hangzhou
2021-12-09	male	29	hangzhou
2021-12-09	male	35	hangzhou
2021-12-09	male	41	hangzhou
2021-12-09	female	63	hangzhou
2021-12-09	male	12	hangzhou
2021-12-09	female	26	hangzhou
2021-12-09	female	53	hangzhou
2021-12-09	male	29	hangzhou
2021-12-09	male	19	hangzhou
2021-12-09	female	61	hangzhou
2021-12-09	female	36	hangzhou
2021-12-09	female	30	hangzhou
2021-12-09	female	41	hangzhou
2021-12-09	male	25	hangzhou
2021-12-09	male	68	hangzhou
2021-12-09	male	12	hangzhou
2021-12-09	male	26	hangzhou
2021-12-10	female	19	hangzhou
2021-12-10	female	50	hangzhou
2021-12-10	male	30	hangzhou
2021-12-10	female	26	hangzhou
2021-12-10	male	39	hangzhou
2021-12-10	male	7	hangzhou
2021-12-10	female	34	hangzhou
2021-12-10	male	24	hangzhou
2021-12-11	male	32	hangzhou
2021-12-11	male	12	hangzhou
2021-12-11	male	24	hangzhou
2021-12-11	male	17	hangzhou
2021-12-11	male	10	hangzhou
2021-12-11	male	47	hangzhou
2021-12-11	male	12	hangzhou
2021-12-11	male	6	hangzhou
2021-12-11	male	5	hangzhou
2021-12-11	male	10	hangzhou
2021-12-11	male	25	hangzhou
2021-12-11	female	24	hangzhou
2021-12-11	female	15	hangzhou
2021-12-11	female	3	hangzhou
2021-12-11	female	49	hangzhou
2021-12-11	male	7	hangzhou
2021-12-11	male	29	hangzhou
2021-12-11	female	51	hangzhou
2021-12-11	male	36	hangzhou
2021-12-11	female	26	hangzhou
2021-12-11	male	28	hangzhou
2021-12-11	male	15	hangzhou
2021-12-12	female	36	hangzhou
2021-12-12	male	15	hangzhou
2021-12-12	male	39	hangzhou
2021-12-12	male	16	hangzhou
2021-12-12	female	53	hangzhou
2021-12-12	female	9	hangzhou
2021-12-12	male	53	hangzhou
2021-12-12	male	33	hangzhou
2021-12-12	male	4	hangzhou
2021-12-12	male	6	hangzhou
2021-12-12	female	43	hangzhou
2021-12-12	male	24	hangzhou
2021-12-12	female	33	hangzhou
2021-12-12	male	26	hangzhou
2021-12-12	female	23	hangzhou
2021-12-13	female	67	hangzhou
2021-12-13	female	31	hangzhou
2021-12-13	female	33	hangzhou
2021-12-13	male	49	hangzhou
2021-12-13	male	61	hangzhou
2021-12-13	male	30	hangzhou
2021-12-13	male	25	hangzhou
2021-12-13	male	49	hangzhou
2021-12-13	female	5	hangzhou
2021-12-13	female	46	hangzhou
2021-12-13	male	21	hangzhou
2021-12-13	female	26	hangzhou
2021-12-14	female	25	hangzhou
2021-12-14	male	41	hangzhou
2021-12-14	female	34	hangzhou
2021-12-14	male	44	hangzhou
2021-12-14	female	44	hangzhou
2021-12-14	male	83	hangzhou
2021-12-14	female	37	hangzhou
2021-12-14	female	62	hangzhou
2021-12-14	female	36	hangzhou
2021-12-14	male	21	hangzhou
2021-12-14	male	58	hangzhou
2021-12-14	female	75	hangzhou
2021-12-14	female	66	hangzhou
2021-12-14	male	21	hangzhou
2021-12-14	female	35	hangzhou
2021-12-14	male	36	hangzhou
2021-12-15	male	68	hangzhou
2021-12-15	male	4	hangzhou
2021-12-15	male	4	hangzhou
2021-12-15	female	39	hangzhou
2021-12-15	male	68	hangzhou
2021-12-15	female	56	hangzhou
2021-12-15	male	82	hangzhou
2021-12-15	male	13	hangzhou
2021-12-15	female	24	hangzhou
2021-12-15	female	39	hangzhou
2021-12-15	female	39	hangzhou
2021-12-15	male	22	hangzhou
2021-12-15	female	35	hangzhou
2021-12-15	female	37	hangzhou
2021-12-15	female	30	hangzhou
2021-12-15	female	32	hangzhou
2021-12-15	male	26	hangzhou
2021-12-16	female	56	hangzhou
2021-12-16	female	10	hangzhou
2021-12-16	female	58	hangzhou
2021-12-16	female	3	hangzhou
2021-12-16	female	53	hangzhou
2021-12-16	male	46	hangzhou
2021-12-16	male	26	hangzhou
2021-12-16	male	75	hangzhou
2021-12-16	female	21	hangzhou
2021-12-16	male	64	hangzhou
2021-12-16	male	40	hangzhou
2021-12-16	female	24	hangzhou
2021-12-16	male	12	hangzhou
2021-12-16	female	29	hangzhou
2021-12-16	female	42	hangzhou
2021-12-16	male	54	hangzhou
2021-12-16	female	26	hangzhou
2021-12-16	male	9	hangzhou
2021-12-17	male	24	hangzhou
2021-12-17	male	50	hangzhou
2021-12-17	male	36	hangzhou
2021-12-17	female	46	hangzhou
2021-12-17	female	21	hangzhou
2021-12-17	male	38	hangzhou
2021-12-17	male	40	hangzhou
2021-12-17	female	35	hangzhou
2021-12-17	male	26	hangzhou
2021-12-17	female	29	hangzhou
2021-12-17	female	58	hangzhou
2021-12-17	male	46	hangzhou
2021-12-17	female	15	hangzhou
2021-12-17	male	6	hangzhou
2021-12-17	female	46	hangzhou
2021-12-18	male	49	hangzhou
2021-12-18	male	27	hangzhou
2021-12-18	female	5	hangzhou
2021-12-18	male	38	hangzhou
2021-12-18	male	52	hangzhou
2021-12-18	male	14	hangzhou
2021-12-18	male	55	hangzhou
2021-12-18	female	6	hangzhou
2021-12-18	male	7	hangzhou
2021-12-18	male	2	hangzhou
2021-12-18	female	35	hangzhou
2021-12-18	female	33	hangzhou
2021-12-18	female	11	hangzhou
2021-12-18	male	14	hangzhou
2021-12-18	female	26	hangzhou
2021-12-18	male	38	hangzhou
2021-12-18	male	30	hangzhou
2021-12-18	male	59	hangzhou
2021-12-18	female	23	hangzhou
2021-12-18	female	48	hangzhou
2021-12-18	male	65	hangzhou
2021-12-18	male	28	hangzhou
2021-12-18	male	6	hangzhou
2021-12-18	female	51	hangzhou
2021-12-18	male	36	hangzhou
2021-12-19	male	45	hangzhou
2021-12-19	male	9	hangzhou
2021-12-19	female	27	hangzhou
2021-12-19	female	40	hangzhou
2021-12-19	female	38	hangzhou
2021-12-19	male	16	hangzhou
2021-12-19	male	27	hangzhou
2021-12-19	female	6	hangzhou
2021-12-19	male	30	hangzhou
2021-12-19	male	60	hangzhou
2021-12-19	female	26	hangzhou
2021-12-19	male	45	hangzhou
2021-12-19	male	24	hangzhou
2021-12-20	male	14	hangzhou
2021-12-20	female	20	hangzhou
2021-12-20	female	35	hangzhou
2021-12-20	male	53	hangzhou
2021-12-20	female	4	hangzhou
2021-12-20	male	35	hangzhou
2021-12-20	female	44	hangzhou
2021-12-20	male	40	hangzhou
2021-12-20	male	37	hangzhou
2021-12-20	female	23	hangzhou
2021-12-20	female	28	hangzhou
2021-12-20	male	21	hangzhou
2021-12-20	male	21	hangzhou
2021-12-21	male	72	hangzhou
2021-12-21	male	27	hangzhou
2021-12-21	female	23	hangzhou
2021-12-21	female	59	hangzhou
2021-12-21	male	39	hangzhou
2021-12-21	female	70	hangzhou
2021-12-21	male	52	hangzhou
2021-12-21	male	77	hangzhou
2021-12-21	female	23	hangzhou
2021-12-21	female	26	hangzhou
2021-12-21	female	35	hangzhou
2021-12-21	male	33	hangzhou
2021-12-21	male	31	hangzhou
2021-12-21	male	23	hangzhou
2021-12-21	female	28	hangzhou
2021-12-22	male	30	hangzhou
2021-12-22	female	37	hangzhou
2021-12-22	female	38	hangzhou
2021-12-22	female	31	hangzhou
2021-12-22	female	5	hangzhou
2021-12-22	female	39	hangzhou
2021-12-22	male	62	hangzhou
2021-12-22	male	56	hangzhou
2021-12-22	female	4	hangzhou
2021-12-22	male	56	hangzhou
2021-12-22	female	24	hangzhou
2021-12-22	female	55	hangzhou
2021-12-22	male	22	hangzhou
2021-12-22	male	45	hangzhou
2021-12-22	male	53	hangzhou
2021-12-23	male	51	hangzhou
2021-12-23	female	28	hangzhou
2021-12-23	male	33	hangzhou
2021-12-23	female	39	hangzhou
2021-12-23	male	23	hangzhou
2021-12-23	male	47	hangzhou
2021-12-23	male	40	hangzhou
2021-12-23	female	59	hangzhou
2021-12-23	male	25	hangzhou
2021-12-23	male	10	hangzhou
2021-12-23	male	36	hangzhou
2021-12-23	male	29	hangzhou
2021-12-23	female	25	hangzhou
2021-12-23	female	24	hangzhou
2021-12-23	male	31	hangzhou
2021-12-23	male	42	hangzhou
2021-12-23	female	38	hangzhou
2021-12-23	male	35	hangzhou
2021-12-24	male	44	hangzhou
2021-12-24	female	42	hangzhou
2021-12-24	male	21	hangzhou
2021-12-24	female	34	hangzhou
2021-12-24	female	27	hangzhou
2021-12-24	male	86	hangzhou
2021-12-24	male	51	hangzhou
2021-12-24	male	11	hangzhou
2021-12-24	male	11	hangzhou
2021-12-24	male	18	hangzhou
2021-12-25	male	47	hangzhou
2021-12-25	female	35	hangzhou
2021-12-25	female	23	hangzhou
2021-12-25	female	23	hangzhou
2021-12-25	male	31	hangzhou
2021-12-25	female	37	hangzhou
2021-12-25	female	5	hangzhou
2021-12-25	female	27	hangzhou
2021-12-25	male	6	hangzhou
2021-12-25	male	15	hangzhou
2021-12-25	male	15	hangzhou
2021-12-26	female	37	hangzhou
2021-12-26	female	52	hangzhou
2021-12-26	female	28	hangzhou
2021-12-26	male	59	hangzhou
2021-12-26	male	31	hangzhou
2021-12-26	male	6	hangzhou
2021-12-26	male	38	hangzhou
2021-12-26	male	26	hangzhou
2021-12-26	female	43	hangzhou
2021-12-26	male	41	hangzhou
2021-12-26	male	27	hangzhou
2021-12-26	female	25	hangzhou
2021-12-26	male	60	hangzhou
2021-12-26	female	10	hangzhou
2021-12-26	female	34	hangzhou
2021-12-26	male	8	hangzhou
2021-12-26	male	7	hangzhou
2021-12-26	female	31	hangzhou
2021-12-26	male	24	hangzhou
2021-12-26	male	31	hangzhou
2021-12-26	male	32	hangzhou
2021-12-27	male	57	hangzhou
2021-12-27	male	66	hangzhou
2021-12-27	female	38	hangzhou
2021-12-27	male	53	hangzhou
2021-12-27	male	32	hangzhou
2021-12-27	male	30	hangzhou
2021-12-27	female	76	hangzhou
2021-12-27	female	23	hangzhou
2021-12-27	female	36	hangzhou
2021-12-27	female	54	hangzhou
2021-12-27	male	48	hangzhou
2021-12-27	male	46	hangzhou
2021-12-27	female	29	hangzhou
2021-12-27	female	23	hangzhou
2021-12-27	female	17	hangzhou
2021-12-27	male	4	hangzhou
2021-12-27	male	5	hangzhou
2021-12-28	female	39	hangzhou
2021-12-28	male	49	hangzhou
2021-12-28	female	80	hangzhou
2021-12-28	male	86	hangzhou
2021-12-28	female	22	hangzhou
2021-12-28	male	51	hangzhou
2021-12-28	male	35	hangzhou
2021-12-28	female	49	hangzhou
2021-12-28	male	34	hangzhou
2021-12-28	female	38	hangzhou
2021-12-28	female	5	hangzhou
2021-12-28	female	38	hangzhou
2021-12-28	female	67	hangzhou
2021-12-28	male	31	hangzhou
2021-12-28	female	22	hangzhou
2021-12-28	female	51	hangzhou
2021-12-28	male	34	hangzhou
2021-12-29	female	41	hangzhou
2021-12-29	male	66	hangzhou
2021-12-29	female	56	hangzhou
2021-12-29	female	27	hangzhou
2021-12-29	female	55	hangzhou
2021-12-29	female	38	hangzhou
2021-12-29	male	22	hangzhou
2021-12-29	female	27	hangzhou
2021-12-30	male	51	hangzhou
2021-12-30	male	4	hangzhou
2021-12-30	female	81	hangzhou
2021-12-30	male	5	hangzhou
2021-12-30	male	29	hangzhou
2021-12-30	male	82	hangzhou
2021-12-30	female	46	hangzhou
2021-12-30	male	34	hangzhou
2021-12-30	male	85	hangzhou
2021-12-30	female	24	hangzhou
2021-12-30	female	17	hangzhou
2021-12-30	female	27	hangzhou
2021-12-30	female	4	hangzhou
2021-12-30	male	57	hangzhou
2021-12-31	female	51	hangzhou
2021-12-31	female	40	hangzhou
2021-12-31	female	39	hangzhou
2021-12-31	male	30	hangzhou
2021-12-31	male	79	hangzhou
2021-12-31	female	39	hangzhou
2021-12-31	female	30	hangzhou
2021-12-31	male	28	hangzhou
2021-12-31	female	39	hangzhou
2021-12-31	female	26	hangzhou
2021-12-31	male	8	hangzhou
2021-12-31	male	77	hangzhou
2021-12-31	male	26	hangzhou
2021-12-31	male	87	hangzhou
2021-12-31	male	35	hangzhou
